# Supplementary material for: Bio-Guided Isolation of SARS-CoV-2 Main Protease Inhibitors from Medicinal Plants: In Vitro Assay and Molecular Dynamics
Source: MDPI journal article supplement (doi:10.3390/plants11151914), 2022-07-24
Supplement: s1 [file s1]

## Supplementary Materials

# Bio-guided Isolation of SARS-COV-2 Main Protease Inhibitors from Medicinal Plants: *In vitro* Assay and Molecular Dynamics

Hossam M. Abdallah <sup>1,\*</sup>, Ali M. El-Halawany <sup>2</sup>, Khaled M. Darwish<sup>3</sup>, Mardi M. Algandaby<sup>4</sup>, Gamal A. Mohamed<sup>1</sup>, Sabrin R. M. Ibrahim<sup>5,6</sup>, Abdulrahman E. Koshak<sup>1</sup>, Sameh S. Elhady<sup>1</sup>, Sana A. Fadil<sup>1</sup>, Ali A. Alqarni<sup>1</sup>, Ashraf B. Abdel-Naim <sup>7</sup> and Mahmoud A. Elfaky<sup>1</sup>

<sup>1</sup> Department of Natural Products and Alternative Medicine, Faculty of Pharmacy, King Abdulaziz University, Jeddah 21589, Saudi Arabia gahusseini@kau.edu.sa (G.A.M.); aekoshak@kau.edu.sa (A.E.K.); ssahmed@kau.edu.sa (S.S.E.); Safadil@kau.edu.sa (S.A.F.); ali.abdullah.10@hotmail.com (A.A.A.); melfaky@kau.edu.sa (M.A.E.)

<sup>2</sup> Department of Pharmacognosy, Faculty of Pharmacy, Cairo University, Cairo 11562, Egypt; ali.elhalawany@pharma.cu.edu.eg

<sup>3</sup> Department of Medicinal Chemistry, Faculty of Pharmacy, Suez Canal University, Ismailia 41522, Egypt; khaled\_darwish@pharm.suez.edu.eg

<sup>4</sup> Department of Biological Sciences, Faculty of Science, King Abdulaziz University, Jeddah 21589, Saudi Arabia; malgandaby@kau.edu.sa

<sup>5</sup> Preparatory Year Program, Department of Chemistry, Batterjee Medical College, Jeddah 21442, Saudi Arabia; sabrin.ibrahim@bmc.edu.sa

<sup>6</sup> Department of Pharmacognosy, Faculty of Pharmacy, Assiut University, Assiut 71526, Egypt

<sup>7</sup> Department of Pharmacology, Faculty of Pharmacy, King Abdulaziz University, Jeddah 21589, Saudi Arabia

\* Correspondence: hmafifi@kau.edu.sa, Tel.: +966-544-733-110

Dr.Hossam  
Sample : P

CDCL<sub>3</sub>

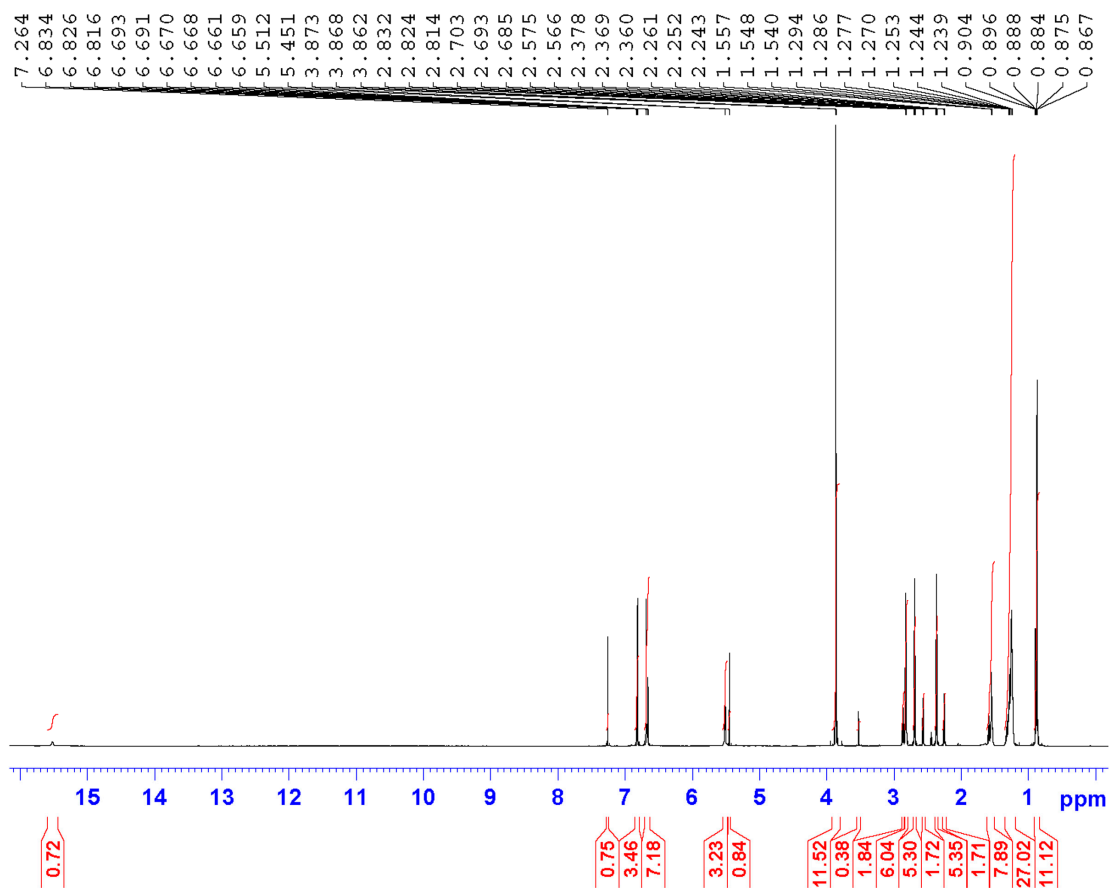

Figure S1. <sup>1</sup>H NMR spectra of 6-paradol.

Dr.Hossam  
Sample : P

CDCL<sub>3</sub>

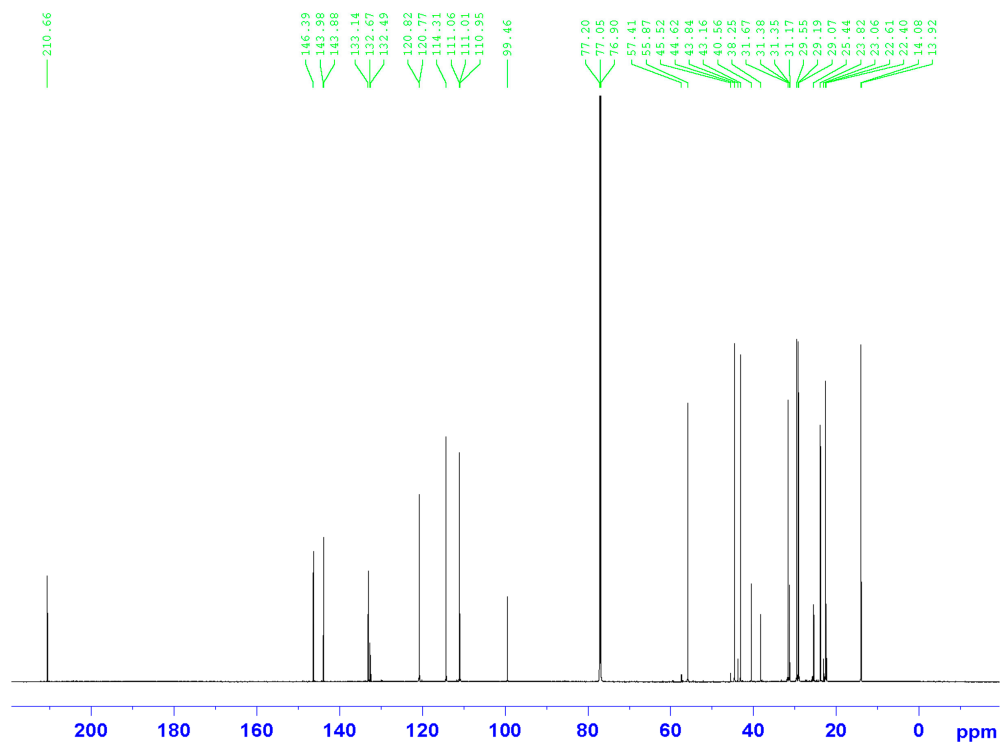

Figure S2. <sup>13</sup>C NMR spectra of 6-paradol.

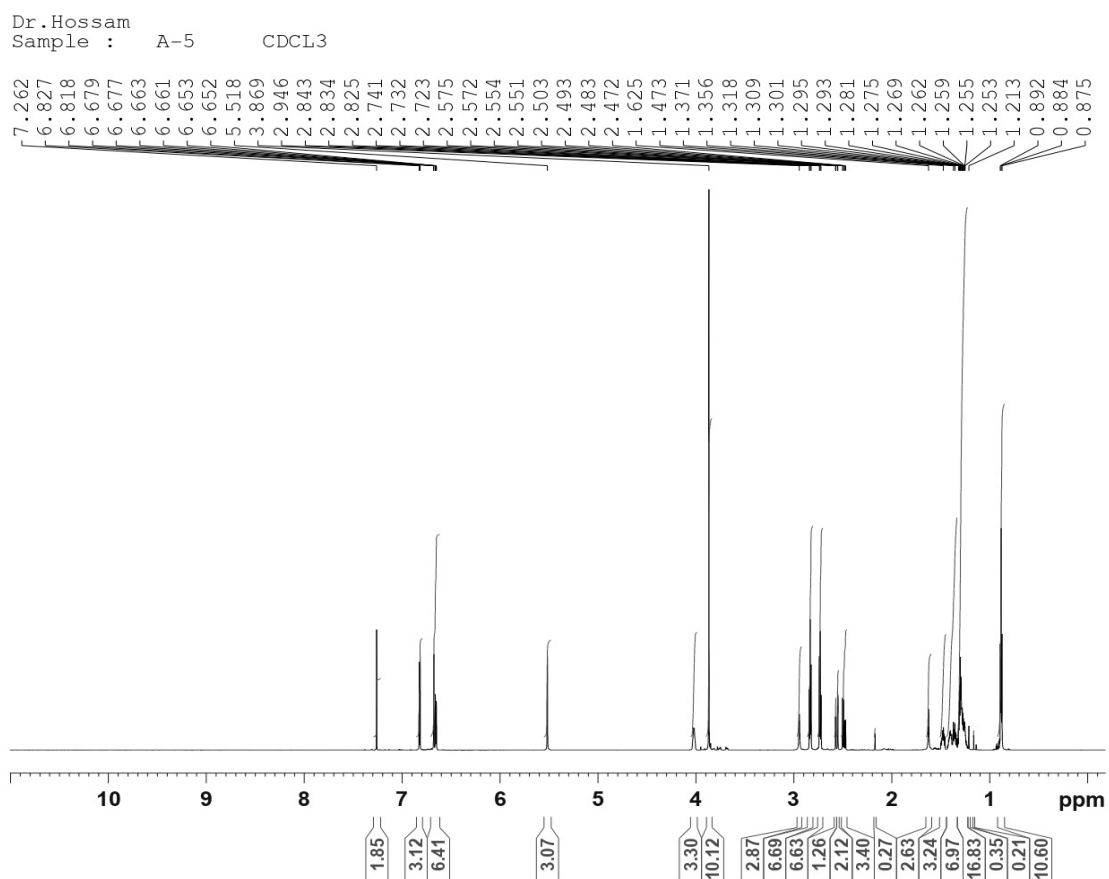

Figure S3. <sup>1</sup>H NMR spectra of 6-geringol.

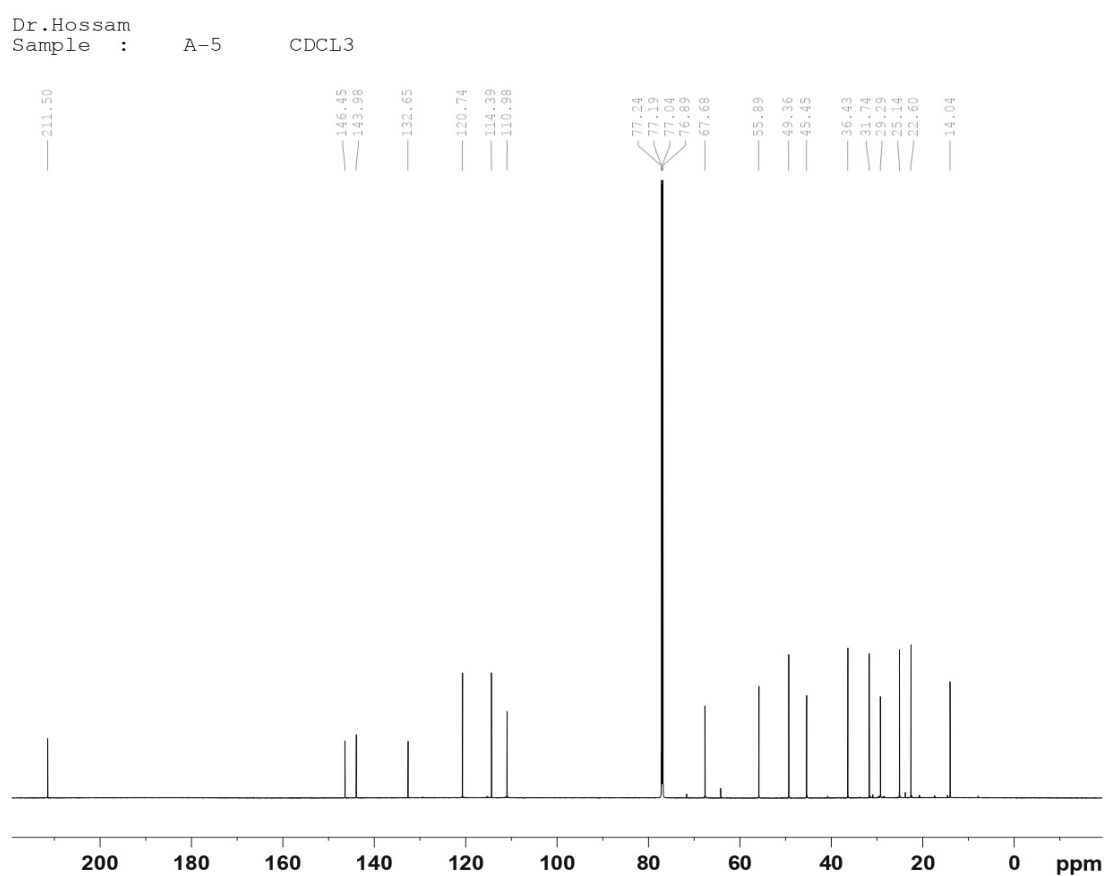

Figure S4. <sup>13</sup>C NMR spectra 6-geringol.

Dr.Hossam  
Sample : PP1 CDCL3

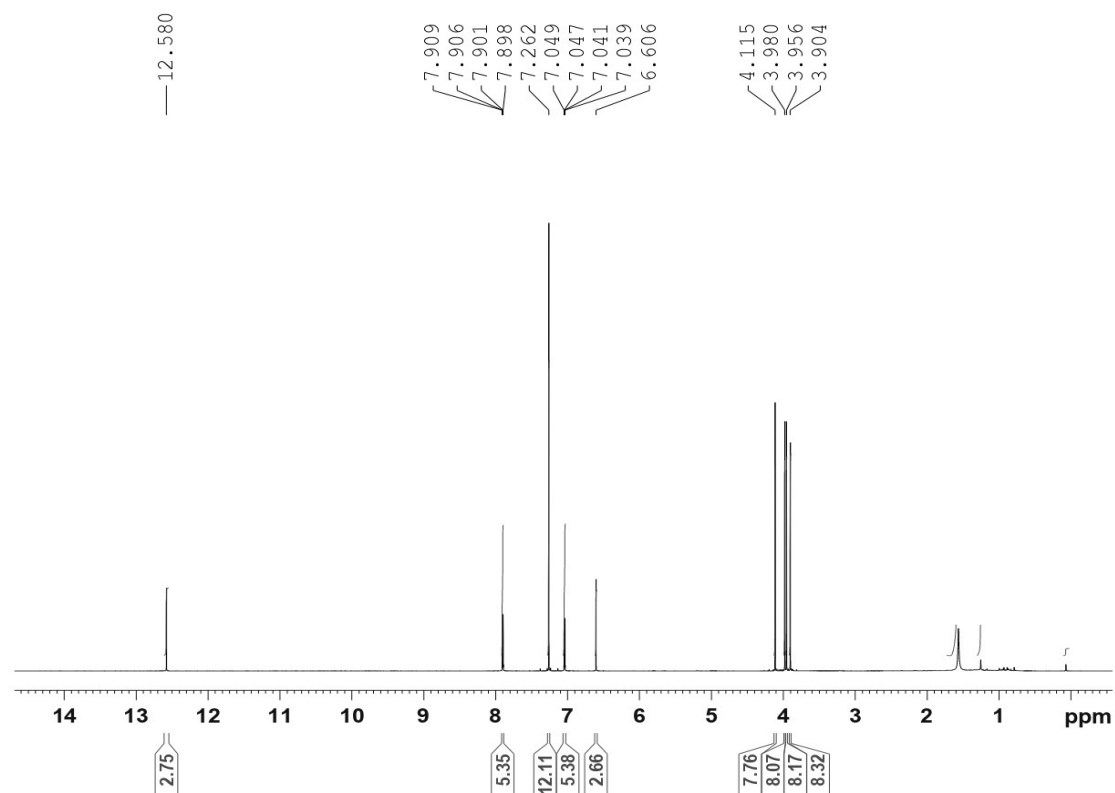

Figure S5.  $^1\text{H}$ NMR spectra of gardenin B.

Dr.Hossam  
Sample : PP-1 CDCL3

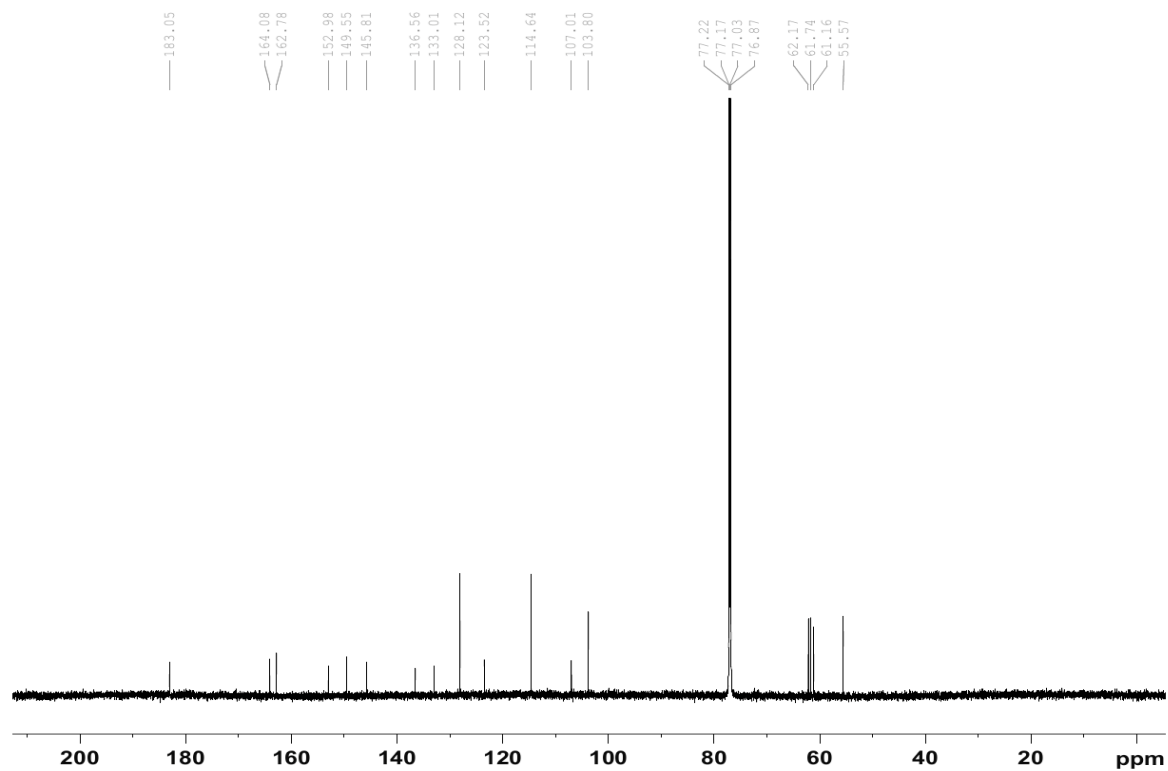

Figure S6.  $^{13}\text{C}$ NMR spectra gardenin B.

Dr.Hossam  
Sample : PP-2 CDCL<sub>3</sub>

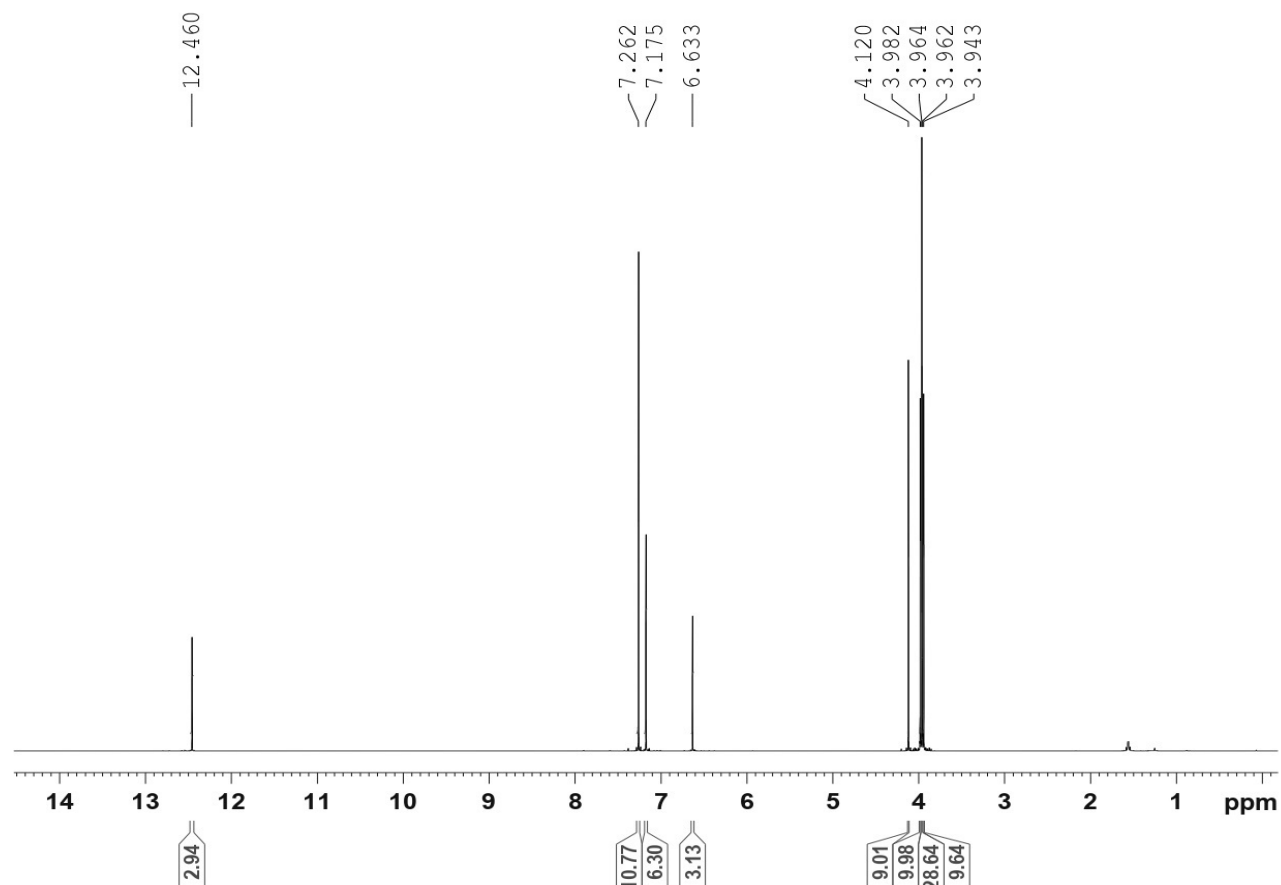

Figure S7. <sup>1</sup>H NMR spectra of gardenin A.

Dr.Hossam  
Sample : PP-2

CDCL<sub>3</sub>

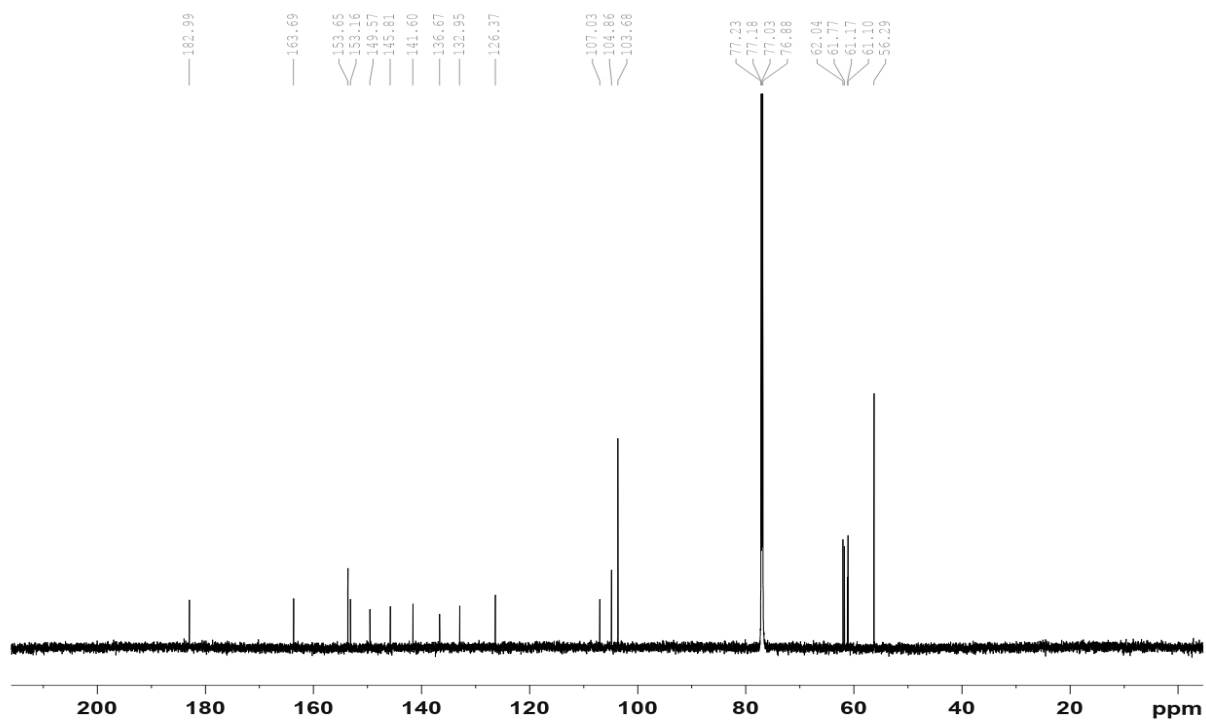

Figure S8. <sup>13</sup>C NMR spectra gardenin A.

Dr. Hossam  
Sample TRY CDCL3

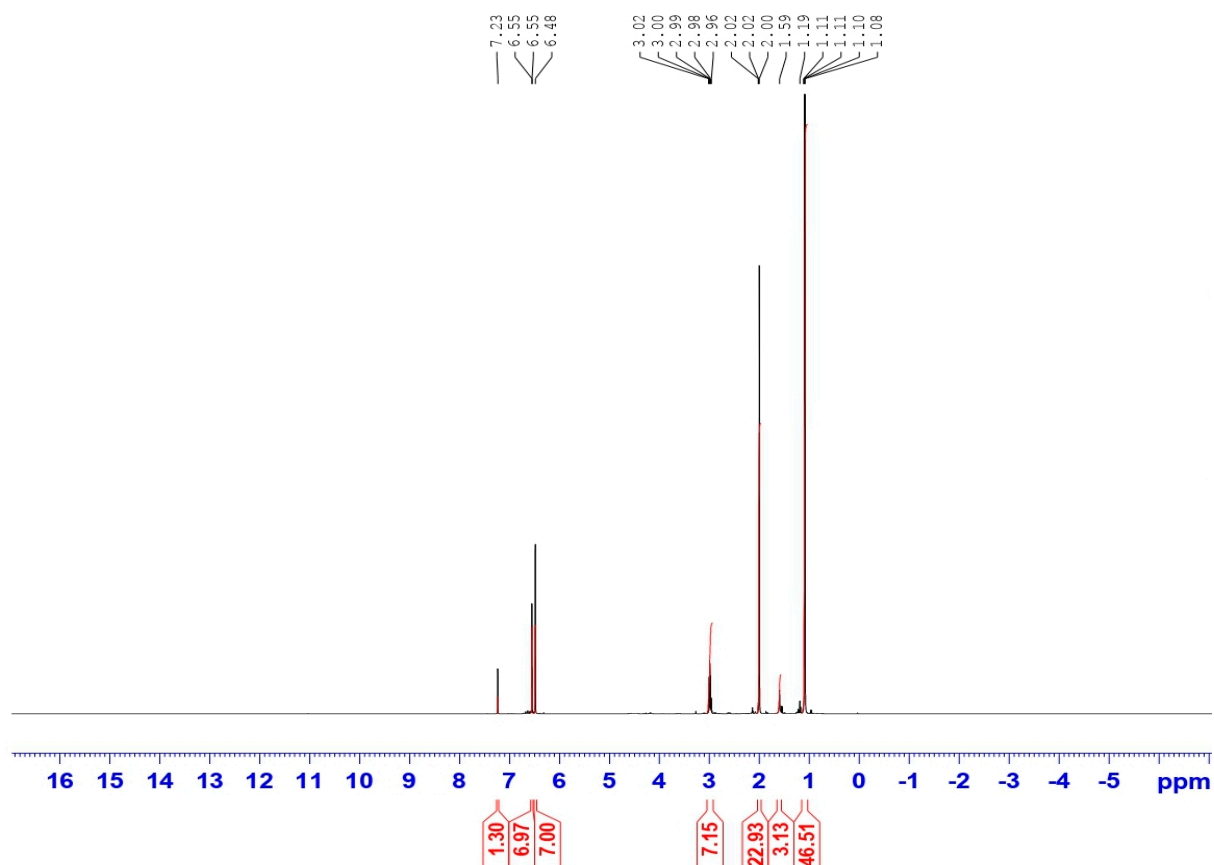

Figure S9. <sup>1</sup>H NMR spectra of thymoquinone.

Dr. Hossam  
Sample TRY CDCL3

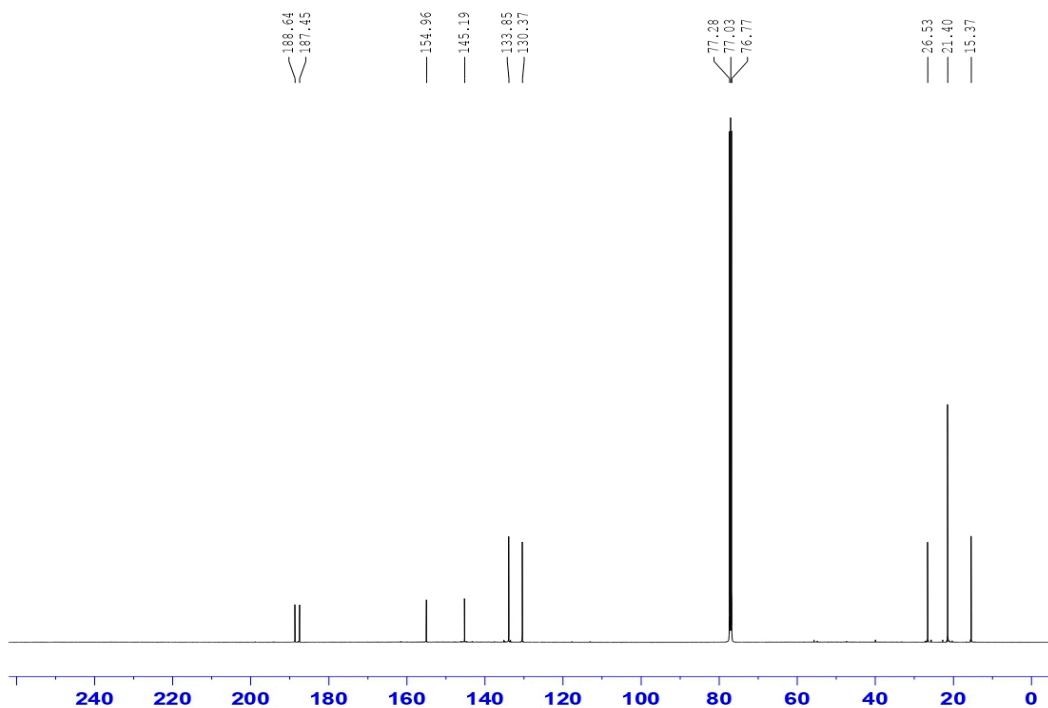

Figure S10. <sup>13</sup>C NMR spectra thymoquinone.

(A)

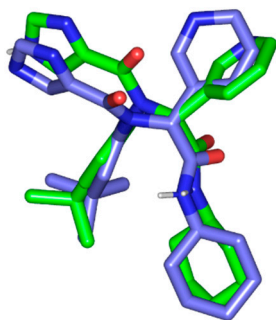

(B)

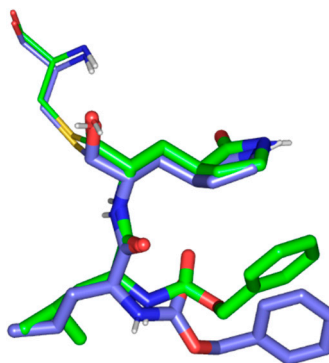

**Figure S11.** Superimposing the co-crystallized (blue sticks) and redocked (green sticks) ligands. (A) non-covalent X77 (PDB: 6W63); (B) covalent GC376 (PDB: 7CBT) forming hemi-thioacetal adduct with Cys145 (lines) for validating the adopted docking protocols.

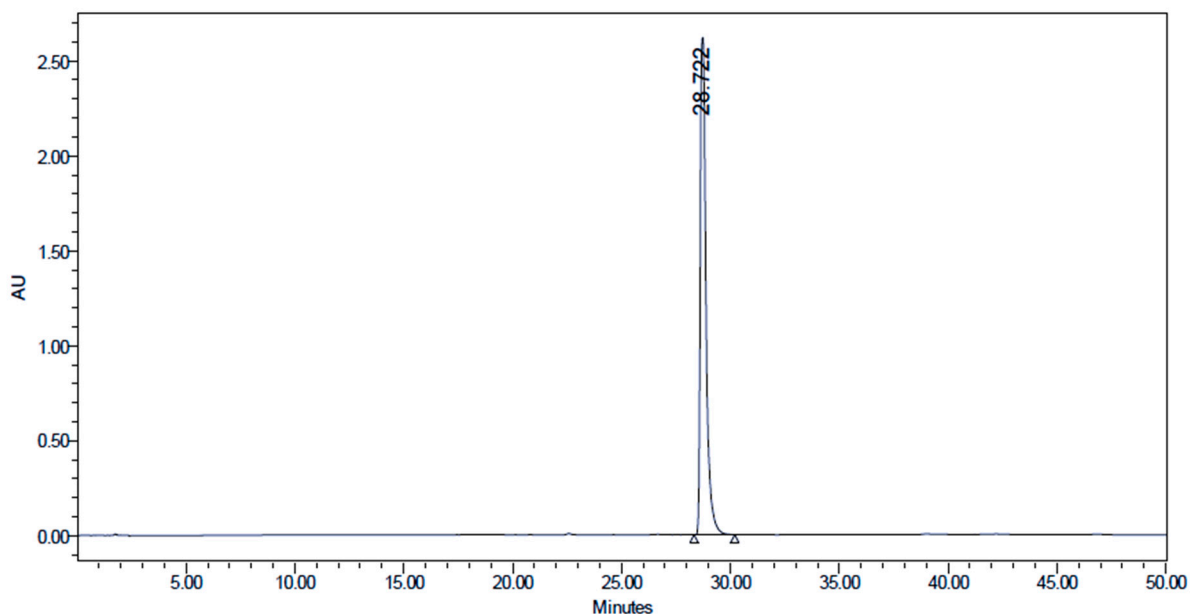

**Figure S12.** Thymoquinone HPLC chromatogram

HPLC was carried out on Waters W2690/5 system equipped with 996 PAD and Empower 3 Software Build 3471 SPs Installed: Feature Release 3. The column used was Kromasil (Sweden) 4.6X150mmX5um. Thymoquinone purity assessment was carried out using mobile phase A (phosphate buffer 20mM Ph 2.) and B; CH<sub>3</sub>CN at 1ml/min flow rate according to the following gradient: 0 min. 95% A, 2 in 95% A, 40 min 20% A 43min 20% A. Spectra were recorded at 253nm. Using the previous condition, the compound purity was found to be 99.5%

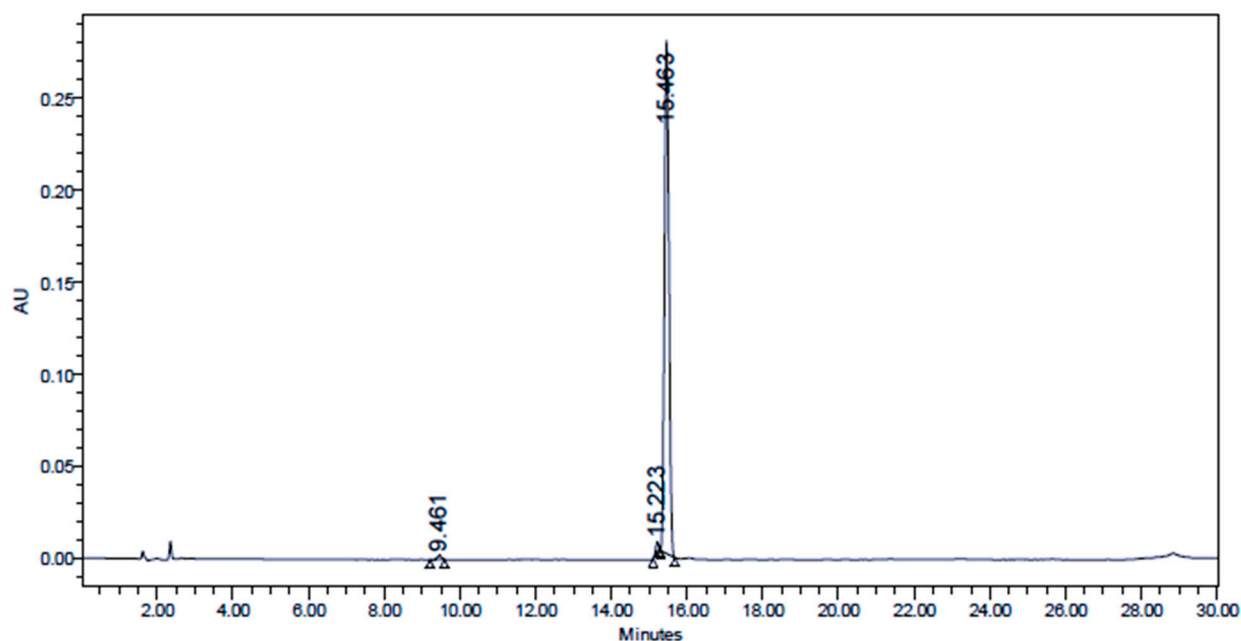

**Figure S13.** 6-Gingerol HPLC chromatogram

HPLC was carried out on Waters W2690/5 system equipped with 996 PAD and Empower 3 Software Build 3471 SPs Installed: Feature Release 3. The column used was Kromasil (Sweden) 4.6X150mmX5um. Gingerol purity was determined using Inertsil C18 4.6X150mmX5um and mobile phase consisting of 0.1% orthophosphoric acid (A) and CH<sub>3</sub>CN (B) gradient elution was as follows; 0 min. 80%A, 2 min 80% A, 20 min 20% A 25 min 20% A. elution was carried out at flow rate of 1 ml/ min and spectra were recorded at 280 nm



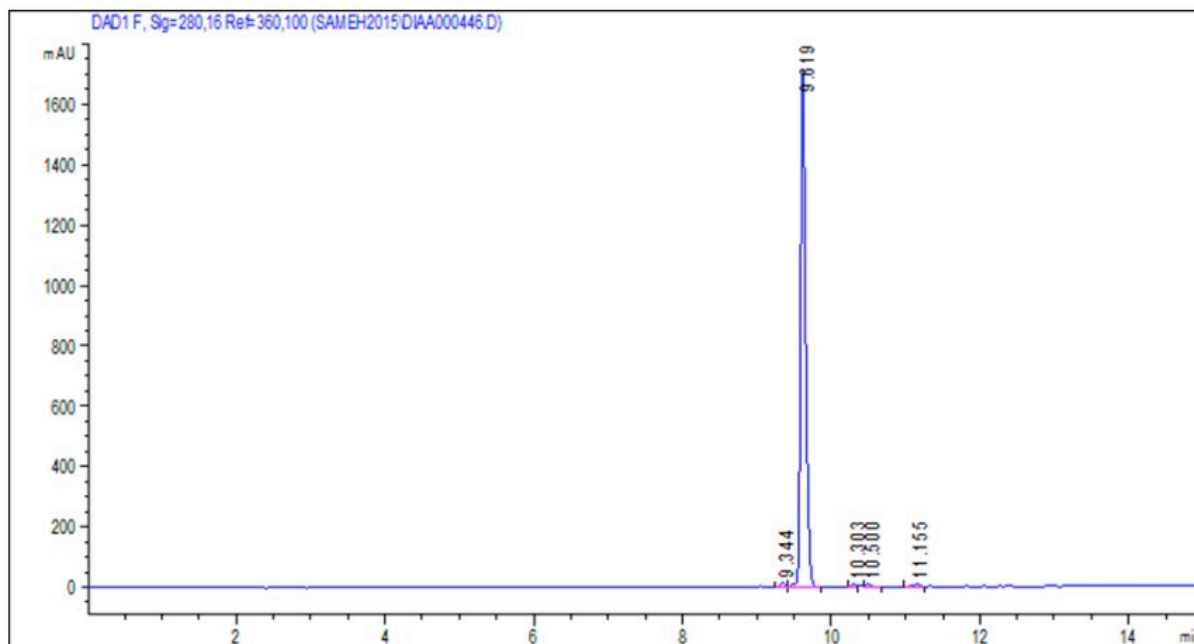

**Figure S14.** 6-Paradol HPLC chromatogram

HPLC was carried out on Agilent 1200 infinity instrument equipped with automatic injector and DAD detector. Paradol was chromatographed gradiently using a mobile phase A (acetonitrile) and B (0.1% TFA). The gradient elution program was: 35 % A (0-2 min), 35 - 60 % A (2-10 min), 60 - 100 % A (10-12 min) and 100 - 35 % A (12-16 min). The flow rate was 1.0 mL/min and the peaks were monitored 280 nm, respectively. Purity of paradol was 97% at these conditions

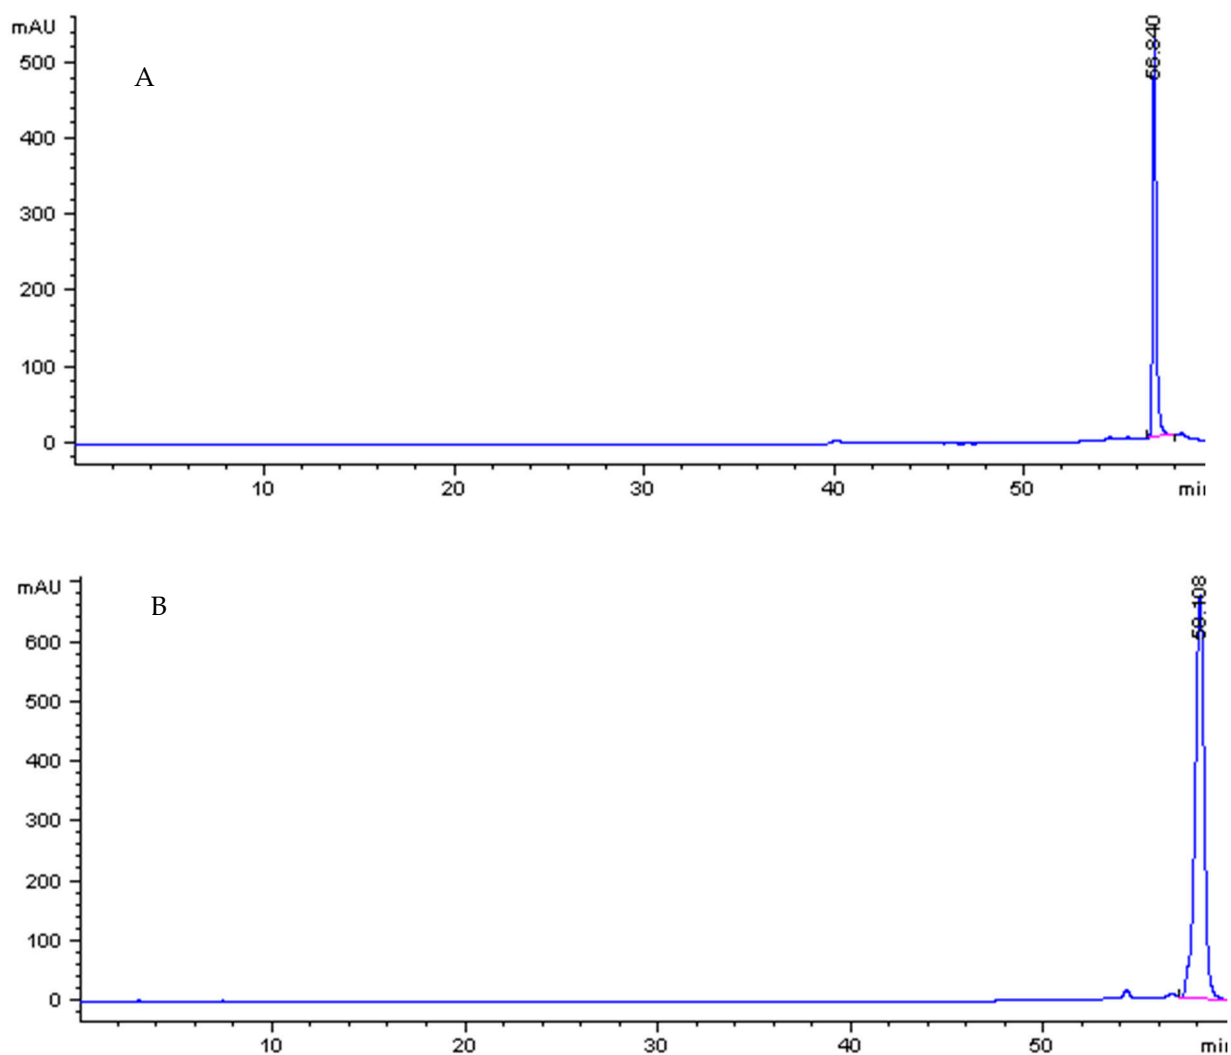

**Figure S15.** Gardenin A (A) and Gardenin B (B) HPLC chromatogram

HPLC system consisted of an Agilent 1200 system, a solvent delivery module, a quaternary pump, an autosampler, a diode-array detector (DAD), and a column compartment (Agilent Zorbax Extend-C18 column (250 mm length  $\times$  4.6 mm, i.d,  $\mu$ m) using Mobile phase: Acetonitril (solvent A) & 0.1% formic acid (solvent B), The gradient elution program was: 20-8% A (0-3 min), 8-42% A (3-45 min), 42-64% A (45-54 min), 64-20% A (54-60 min), 20% A (60-65 min). The flow rate was 1.0 mL/min and the peaks were monitored 280 nm, respectively. Purity of Gardenin A (A) and Gardenin B (B) were 97% at these conditions
